# Supplementary material for: Identification of a novel inactivating mutation in Isocitrate Dehydrogenase 1 (IDH1-R314C) in a high grade astrocytoma
Source: PubMed Central journal article supplement (PMC4962051; doi:10.1038/srep30486), 2016-07-27
Supplement: srep30486-s1.pdf [file srep30486-s1.pdf]

Supplementary data to 'Identification of a novel inactivating mutation in Isocitrate Dehydrogenase 1 (IDH1-R314C) in a high grade astrocytoma.'

Sanne A.M. van Lith<sup>1</sup>, Anna C. Navis<sup>1</sup>, Krissie Lenting<sup>1</sup>, Kiek Verrijp<sup>1</sup>, Jan T.G. Schepens<sup>2</sup>, Wiljan J.A.J. Hendriks<sup>2</sup>, Nil A. Schubert<sup>1</sup>, Hanka Venselaar<sup>3</sup>, Ron A. Wevers<sup>4</sup>, Arno van Rooij<sup>4</sup>, Pieter Wesseling<sup>1,5</sup>, Remco J. Molenaar<sup>6</sup>, Cornelis J.F. van Noorden<sup>6</sup>, Stefan Pusch<sup>7</sup>, Bastiaan Tops<sup>1</sup> and William P.J. Leenders<sup>1\*</sup>

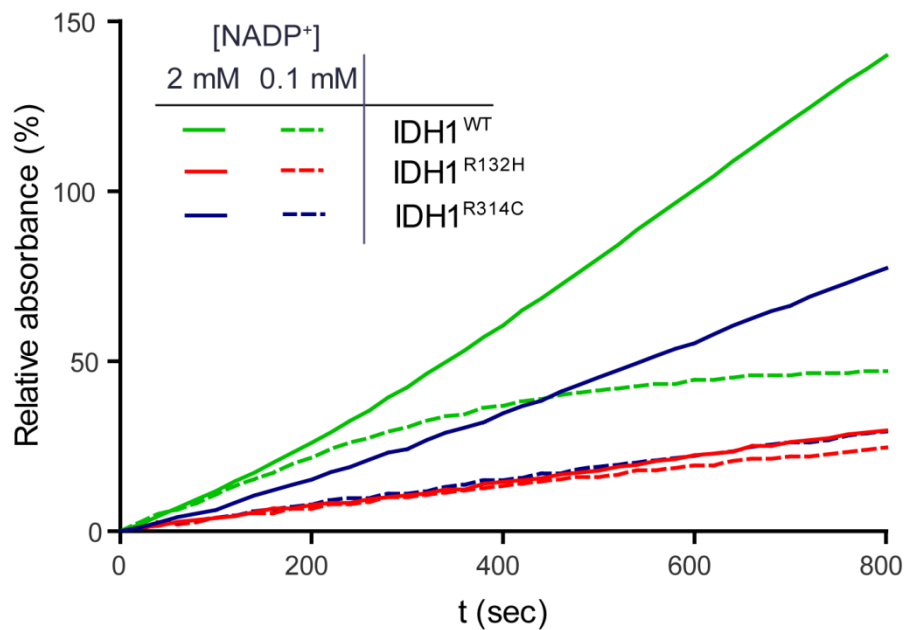

Supplementary Figure 1. IDH1<sup>R314C</sup> activity can be rescued by supraphysiological NADP<sup>+</sup> levels. Extracts of U251-IDH1<sup>R314C</sup> U251-IDH1<sup>R132H</sup> or U251-IDH1<sup>WT</sup> were incubated with isocitrate and 100  $\mu$ M or 2 mM NADP<sup>+</sup>, and NADPH formation was measured in real time by 340 nm absorbance. The activity of IDH1<sup>R314C</sup>-BAPHIS but not IDH1<sup>R132H</sup>-BAPHIS was partly rescued by increasing NADP<sup>+</sup> concentrations to 2 mM.

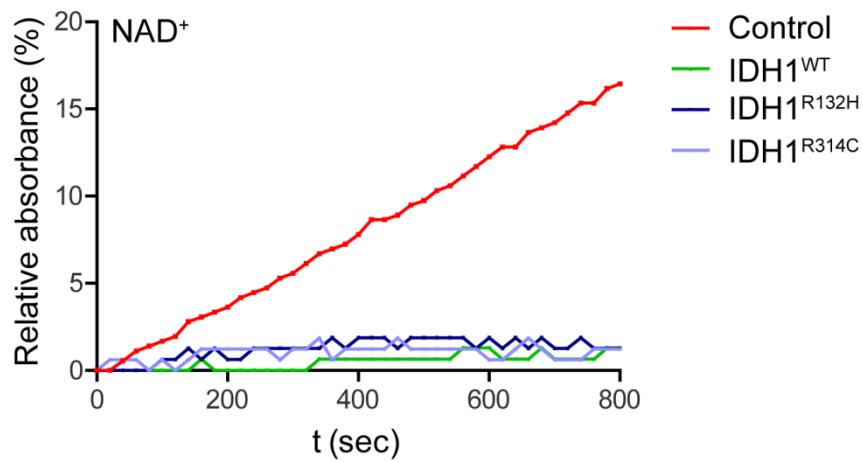

Supplementary Figure 2. The R314C mutation does not shift the cofactor dependency from NADP<sup>+</sup> to NAD<sup>+</sup>. IDH1<sup>MUT</sup>-GST enzymes were incubated with isocitrate and NAD<sup>+</sup>, and NADH formation was measured by 340 nm absorbance. All IDH1 enzymes were inactive in the presence of NAD<sup>+</sup>. As a positive control a liver extract was used.

| Diagnosis                   | Number of samples | Number of samples verified IDH1 <sup>R132H</sup> | Number of samples verified IDH1 <sup>WT</sup> |
|-----------------------------|-------------------|--------------------------------------------------|-----------------------------------------------|
| GBM                         | 47                | 1                                                | 42                                            |
| Astrocytoma grade II        | 13                | 5                                                | 8                                             |
| Astrocytoma grade III       | 2                 | 0                                                | 1                                             |
| Oligodendroglioma grade II  | 18                | 13                                               | 3                                             |
| Oligodendroglioma grade III | 3                 | 0                                                | 2                                             |
| Oligodendroglioma grade IV  | 1                 | 0                                                | 1                                             |
| Oligoastrocytoma grade II   | 14                | 9                                                | 3                                             |
| Oligoastrocytoma grade III  | 3                 | 0                                                | 3                                             |
| Oligoastrocytoma grade IV   | 2                 | 2                                                | 0                                             |

Supplementary Table 1. Overview of glioma samples used for Sanger sequencing of *IDH1*<sup>R314C</sup>, with diagnosis and *IDH1* status.
